# Supplementary material for: Population Dynamics of Phytophthora infestans in the Netherlands Reveals Expansion and Spread of Dominant Clonal Lineages and Virulence in Sexual Offspring
Source: G3 (Bethesda). 2012 Dec 1;2(12):1529–40. doi: 10.1534/g3.112.004150 (PMC3516475; doi:10.1534/g3.112.004150)
Supplement: Supporting Information [file supp_2.12.1529_FileS1.xlsx]

## Sheet: Sheet1
Sample Name	Year	Location	Latitude	Longitude	Host	Cultivar	Region	Mating Type	Haplo Type	Taqman class I Avrblb/ipiO	Virulence assays on Rpi-blb1
80029	1980	Weert	51°14'	5°42'	S. tuberosum	Bintje	SE	A1	Ia	avirulent
88133	1988	Zuid Holland (prov.)	52°01'	4°29'	S. tuberosum	Bintje	SW	A2	Ia	avirulent
90128	1990	Geldrop	51°25'	5°33'	S. tuberosum	n.d.	SE	A1	Ia	avirulent
98014	1998	Drenthe (prov.)	52°56'	6°37'	S. tuberosum	n.d.	NE	A1	Ia	avirulent
428_2	1992	Ede	52°02'	5°40'	S. tuberosum	n.d.	SE	A2	Ia	avirulent
88-79	1988	n.d.			n.d.	n.d.	n.d.	A1	Ia	avirulent
Flevo_K2_27	1990	Flevoland (prov.)	52°31'	5°35'	S. tuberosum	n.d.	C	A1	Ia	avirulent
herisolatie_L.Davidse_nr_42	1985	n.d.			n.d.	n.d.	n.d.	A2	Ia	avirulent
Hertha_lienden_1985	1985	Lienden	51°56'	5°31'	S. tuberosum	Hertha	SE	A2	Ia	avirulent
Hertha_renkum_1983	1983	Renkum	51°59'	5°44'	S. tuberosum	Hertha	SE	A1	Ia	avirulent
IPO00506	2000	Wageningen	51°58'	5°39'	S. dulcamara	n.d.	SE	A2	IIa	avirulent
IPO00507	2000	Wageningen	51°58'	5°39'	S. dulcamara	n.d.	SE	A1	Ia	avirulent
IPO00514	2000	Hoogezand	53°09'	6°44'	S. sisymbriifolium	n.d.	NE	A2	Ia	avirulent
IPO00518	2000	Hoogezand	53°09'	6°44'	S. sisymbriifolium	n.d.	NE	A2	Ia	avirulent
Ipo-complex	1982	Gembloux	50°33'	4°42'	S. tuberosum	n.d.	SE	A2	Ia	avirulent
Isolaat_308	1968	n.d.			n.d.	n.d.	n.d.	A1	Ib	avirulent
Isolaat_87-16	1987	n.d.			n.d.	n.d.	n.d.	A2	Ia	avirulent
Leen_davidse_87134	1987	Bennekom	52°00'	5°40'	Lycopersicon esculentum	Tomato	SE	A2	Ia	avirulent
lienden_1990	1990	Lienden	51°56'	5°31'	S. tuberosum	n.d.	SE	A1	Ia	avirulent
monster_3_nude	1985	Wageningen	51°58'	5°39'	n.d.	n.d.	SE	A1	Ia	avirulent
NL00007	2000	Buinerveen	52°56'	6°52'	S. tuberosum	Karakter	NE	A2	Ia	avirulent
NL00026	2000	Buinerveen	52°56'	6°52'	S. tuberosum	Karakter	NE	A2	Ia	avirulent
NL00040	2000	Nieuwediep	53°02'	6°51'	S. tuberosum	Kartel	NE	A1	Ia	avirulent
NL00047	2000	Nieuwediep	53°02'	6°51'	S. tuberosum	Kartel	NE	A2	IIa	avirulent
NL00062	2000	Exloerveen	52°54'	6°54'	S. tuberosum	Karnico	NE	A2	Ia	virulent	virulent
NL00069	2000	Exloerveen	52°54'	6°54'	S. tuberosum	Karnico	NE	A2	Ia	virulent	virulent
NL00075	2000	Valthermond	52°52'	6°56'	S. tuberosum	Florijn	NE	A2	Ia	avirulent
NL00086	2000	Valthermond	52°52'	6°56'	S. tuberosum	Florijn	NE	A2	Ia	avirulent
NL00096	2000	Drenthe (prov.)	52°56'	6°37'	S. tuberosum	n.d.	NE	A1	Ib	avirulent
NL00104	2000	Valthermond	52°52'	6°56'	S. tuberosum	n.d.	NE	A1	n.d.	avirulent
NL00120	2000	Evertsoord	51°24'	5°57'	S. tuberosum	Bintje	SE	A1	Ia	avirulent
NL00127	2000	Evertsoord	51°24'	5°57'	S. tuberosum	Bintje	SE	A2	Ia	avirulent
NL00136	2000	Ysselsteijn	51°29'	5°53'	S. tuberosum	Asterix	SE	A1	Ia	avirulent
NL00143	2000	Maasbree	51°21'	6°03'	S. tuberosum	Bintje	SE	A1	Ia	avirulent
NL00150	2000	Maasbree	51°21'	6°03'	S. tuberosum	Bintje	SE	A1	Ia	avirulent
NL00164	2000	Leveroy	51°14'	5°50'	S. tuberosum	Bintje	SE	A1	Ia	avirulent
NL00171	2000	Leveroy	51°14'	5°50'	S. tuberosum	Bintje	SE	A1	Ia	avirulent
NL00175	2000	St.Oedenrode	51°33'	5°27'	S. tuberosum	Bintje	SE	A1	Ia	avirulent
NL00185	2000	St.Oedenrode	51°33'	5°27'	S. tuberosum	Bintje	SE	A2	IIa	avirulent
NL00187	2000	St.Oedenrode	51°33'	5°27'	S. tuberosum	Bintje	SE	A1	Ia	avirulent
NL00202	2000	Olland	51°34'	5°24'	S. tuberosum	Russet Burbank	SE	A1	Ia	avirulent
NL00214	2000	Olland	51°34'	5°24'	S. tuberosum	Russet Burbank	SE	A1	IIa	avirulent
NL00228	2000	Dinteloord	51°38'	4°22'	S. tuberosum	Bintje	SW	A2	Ia	avirulent
NL00234	2000	Dinteloord	51°38'	4°22'	S. tuberosum	Bintje	SW	A1	Ia	avirulent
NL00242	2000	De Heen	51°36'	4°16'	S. tuberosum	Lady Rosetta	SW	A2	IIa	avirulent
NL00279	2000	Kamperland	51°34'	3°42'	S. tuberosum	Bintje	SW	A1	Ia	avirulent
NL00309	2000	Veghel	51°36'	5°32'	S. tuberosum	n.d.	SE	A1	Ia	avirulent
NL00310	2000	Veghel	51°36'	5°32'	S. tuberosum	n.d.	SE	A1	Ia	avirulent
NL00312	2000	Haps	51°41'	5°51'	S. tuberosum	Bintje	SE	n.d.	Ia	avirulent
NL00323	2000	Biddinghuizen	52°27'	5°41'	S. tuberosum	Bimonda	C	A1	Ia	avirulent
NL00332	2000	Biddinghuizen	52°27'	5°41'	S. tuberosum	Remarka	C	A2	IIa	avirulent
NL00333	2000	Creil	52°45'	5°39'	S. tuberosum	Agria	C	A1	Ia	avirulent
NL00339	2000	Creil	52°45'	5°39'	S. tuberosum	Bimonda	C	A1	Ia	avirulent
NL00350	2000	Creil	52°45'	5°39'	S. tuberosum	Innovator	C	A2	Ia	avirulent
NL00357	2000	Gasselternijveenschemond	52°59'	6°53'	S. tuberosum	n.d.	NE	A2	Ia	avirulent
NL00371	2000	Gasselternijveenschemond	52°59'	6°53'	S. tuberosum	n.d.	NE	A1	IIa	avirulent
NL00399	2000	Zeewolde	52°19'	5°32'	S. tuberosum	n.d.	C	A1	Ia	avirulent
NL00405	2000	Stiens	53°15'	5°46'	S. tuberosum	Innovator	N	A1	IIa	avirulent
NL00412	2000	Bantega	52°50'	5°47'	S. tuberosum	n.d.	N	A2	Ia	avirulent
NL00416	2000	Bantega	52°50'	5°47'	S. tuberosum	n.d.	N	A1	Ia	avirulent
NL00474	2000	Wageningen	51°58'	5°39'	S. tuberosum	Pimpernel	SE	A1	IIa	avirulent
NL00491	2000	Emmeloord	52°42'	5°45'	S. tuberosum	n.d.	C	A1	Ia	avirulent
NL00494	2000	Wageningen	51°58'	5°39'	S. tuberosum	Bintje	SE	A1	Ia	avirulent
NL00531	2000	Wijster	52°48'	6°31'	S. tuberosum	n.d.	NE	A2	Ia	avirulent
NL00547	2000	Wieringerwerf	52°51'	5°01'	S. tuberosum	Altmaria	NW	A1	Ia	avirulent
NL00551	2000	Wieringerwerf	52°51'	5°01'	S. tuberosum	Altmaria	NW	A1	Ia	avirulent
NL00553	2000	Wieringerwerf	52°51'	5°01'	S. tuberosum	Altmaria	NW	A1	Ia	avirulent
NL00556	2000	Drenthe (prov.)	52°56'	6°37'	S. tuberosum	n.d.	NE	A1	Ia	avirulent
NL00559	2000	Emmeloord	52°42'	5°45'	S. tuberosum	n.d.	C	A1	Ia	avirulent
NL00563	2000	Odoorn	52°51'	6°50'	S. tuberosum	Premiere	NE	A2	Ia	avirulent
NL00568	2000	Odoorn	52°51'	6°50'	S. tuberosum	Premiere	NE	A2	Ia	avirulent
NL01005	2001	Emmen	52°47'	6°53'	S. tuberosum	n.d.	NE	A1	Ia	avirulent
NL01013	2001	Emmen	52°47'	6°53'	S. tuberosum	n.d.	NE	A1	IIa	avirulent
NL01028	2001	Hoogersmilde	52°54'	6°23'	S. tuberosum	n.d.	NE	A1	Ia	avirulent
NL01039	2001	Hoogersmilde	52°54'	6°23'	S. tuberosum	n.d.	NE	A2	IIa	avirulent
NL01047	2001	Witten	51°26'	7°21'	S. tuberosum	n.d.	NE	A1	Ia	avirulent
NL01053	2001	Witten	51°26'	7°21'	S. tuberosum	n.d.	NE	A1	Ia	avirulent
NL01055	2001	Drouwen	52°57'	6°47'	S. tuberosum	n.d.	NE	A1	Ia	avirulent
NL01060	2001	Drouwen	52°57'	6°47'	S. tuberosum	n.d.	NE	A1	Ia	avirulent
NL01063	2001	Langelo	53°05'	6°26'	S. tuberosum	n.d.	NE	A2	Ia	avirulent
NL01069	2001	Langelo	53°05'	6°26'	S. tuberosum	n.d.	NE	A2	Ia	avirulent
NL01072	2001	Valthermond	52°52'	6°56'	S. tuberosum	n.d.	NE	A1	Ia	avirulent
NL01073	2001	Valthermond	52°52'	6°56'	S. tuberosum	n.d.	NE	A1	Ia	avirulent
NL01084	2001	Wijster	52°48'	6°31'	S. tuberosum	n.d.	NE	A1	Ia	avirulent
NL01085	2001	Wijster	52°48'	6°31'	S. tuberosum	n.d.	NE	A1	Ia	avirulent
NL01096	2001	Katshaar	52°40'	6°50'	S. tuberosum	n.d.	NE	A2	IIa	avirulent
NL01099	2001	Katshaar	52°40'	6°50'	S. tuberosum	n.d.	NE	A2	Ia	avirulent
NL01108	2001	Hooghalen	52°55'	6°32'	S. tuberosum	n.d.	NE	A2	Ia	avirulent
NL01139	2001	Gasselternijveenschemond	52°59'	6°53'	S. tuberosum	n.d.	NE	A2	Ia	avirulent
NL01141	2001	Gasselternijveenschemond	52°59'	6°53'	S. tuberosum	n.d.	NE	A1	Ia	avirulent
NL01142	2001	Opeinde	53°08'	6°03'	S. tuberosum	n.d.	N	A2	Ia	avirulent
NL01164	2001	Roswinkel	52°50'	7°02'	S. tuberosum	n.d.	NE	A1	Ia	avirulent
NL01169	2001	Valthermond	52°52'	6°56'	S. tuberosum	n.d.	NE	A2	IIa	avirulent
NL01172	2001	Valthermond	52°52'	6°56'	S. tuberosum	n.d.	NE	A2	IIa	avirulent
NL01900	2001	Wageningen	51°58'	5°39'	Solanum spp.	n.d.	SE	A1	Ia	avirulent
NL02002	2002	Smilde	52°56'	6°26'	S. tuberosum	n.d.	NE	A1	Ib	avirulent
NL02010	2002	Smilde	52°56'	6°26'	S. tuberosum	n.d.	NE	A2	Ia	avirulent
NL02037	2002	Veenoord	52°42'	6°50'	S. tuberosum	n.d.	NE	A1	Ia	avirulent
NL02048	2002	De Groeve	53°07'	6°42'	S. tuberosum	n.d.	NE	A1	Ia	avirulent
NL02051	2002	Zeeland	51°29'	3°50'	S. tuberosum	n.d.	SW	A1	Ia	avirulent
NL02054	2002	Zeeland	51°29'	3°50'	S. tuberosum	n.d.	SW	A1	Ia	avirulent
NL02055	2002	Zeeland	51°29'	3°50'	S. tuberosum	n.d.	SW	A1	Ia	avirulent
NL02057	2002	Vlagtwedde	53°01'	7°07'	S. tuberosum	n.d.	NE	A1	Ia	avirulent
NL02059	2002	Vlagtwedde	53°01'	7°07'	S. tuberosum	n.d.	NE	A2	Ia	avirulent
NL02068	2002	Vlagtwedde	53°01'	7°07'	S. tuberosum	n.d.	NE	A1	Ia	avirulent
NL02074	2002	Dalerveen	52°41'	6°48'	S. tuberosum	n.d.	NE	A1	Ia	avirulent
NL02083	2002	Dalerveen	52°41'	6°48'	S. tuberosum	n.d.	NE	A1	Ia	avirulent
NL02085	2002	Lelystad	52°31'	5°28'	S. tuberosum	n.d.	C	A1	lb	avirulent
NL02087	2002	Lelystad	52°31'	5°28'	S. tuberosum	n.d.	C	A1	Ia	avirulent
NL02091	2002	Rolde	52°59'	6°38'	S. tuberosum	n.d.	NE	A1	IIa	avirulent
NL02093	2002	Rolde	52°59'	6°38'	S. tuberosum	n.d.	NE	A2	Ia	avirulent
NL02096	2002	Dalerveen	52°41'	6°48'	S. tuberosum	n.d.	NE	A2	Ia	avirulent
NL02097	2002	Dalerveen	52°41'	6°48'	S. tuberosum	n.d.	NE	A2	Ia	avirulent
NL02098	2002	Nieuwe Krim	52°40'	6°39'	S. tuberosum	n.d.	NE	A2	IIa	avirulent
NL02099	2002	Nieuwe Krim	52°40'	6°39'	S. tuberosum	n.d.	NE	A2	IIa	avirulent
NL02101	2002	Weert	51°14'	5°42'	S. tuberosum	n.d.	SE	A1	Ia	avirulent
NL02104	2002	Nagele	52°38'	5°43'	S. tuberosum	Markies	C	A2	IIa	avirulent
NL02106	2002	Nagele	52°38'	5°43'	S. tuberosum	n.d.	C	A1	Ia	avirulent
NL02110	2002	Grolloo	52°56'	6°40'	S. tuberosum	n.d.	NE	A2	IIa	avirulent
NL02113	2002	Grolloo	52°56'	6°40'	S. tuberosum	n.d.	NE	A2	IIa	avirulent
NL02114	2002	Grolloo	52°56'	6°40'	S. tuberosum	n.d.	NE	A2	IIa	avirulent
NL02117	2002	Haps	51°41'	5°51'	S. tuberosum	n.d.	SE	A1	Ib	avirulent
NL02123	2002	Erm	52°44'	6°49'	S. tuberosum	n.d.	NE	A1	Ia	avirulent
NL02124	2002	Erm	52°44'	6°49'	S. tuberosum	n.d.	NE	A1	IIa	avirulent
NL03002	2003	Hebrecht	53°02'	7°09'	S. tuberosum	n.d.	SW	A2	lb	avirulent
NL03006	2003	Exloërmond	52°56'	6°56'	S. tuberosum	n.d.	NE	A2	Ib	avirulent
NL03011	2003	Nieuw-Amsterdam	52°42'	6°51'	S. tuberosum	n.d.	NE	A1	Ia	avirulent
NL03013	2003	Afferden	51°38'	6°00'	S. tuberosum	n.d.	SE	A2	Ia	avirulent
NL03020	2003	Afferden	51°38'	6°00'	S. tuberosum	n.d.	SE	A2	IIa	avirulent
NL03029	2003	Zuidwolde	52°40'	6°25'	S. tuberosum	n.d.	C	A2	Ia	avirulent
NL03035	2003	Meppen	52°41'	7°17'	S. tuberosum	n.d.	NE	A2	Ia	avirulent
NL03037	2003	Meppen	52°41'	7°17'	S. tuberosum	n.d.	NE	A2	lb	avirulent
NL03040	2003	Sellingen	52°56'	7°08'	S. tuberosum	n.d.	NE	A1	lb	avirulent
NL03042	2003	Sellingen	52°56'	7°08'	S. tuberosum	n.d.	NE	A1	IIa	avirulent
NL03047	2003	Valthermond	52°52'	6°56'	S. tuberosum	n.d.	NE	A1	IIa	avirulent
NL03048	2003	Valthermond	52°52'	6°56'	S. tuberosum	n.d.	NE	A1	IIa	avirulent
NL03049	2003	Sellingen	52°56'	7°08'	S. tuberosum	Mercator	NE	A1	IIa	avirulent
NL03051	2003	Sellingen	52°56'	7°08'	S. tuberosum	Seresta	NE	A2	IIa	avirulent
NL03052	2003	Sellingen	52°56'	7°08'	S. tuberosum	Mercator	NE	A2	Ia	avirulent
NL03053	2003	Emmeloord	52°42'	5°45'	S. tuberosum	n.d.	C	A2	Ia	avirulent
NL03056	2003	Emmeloord	52°42'	5°45'	S. tuberosum	n.d.	C	A2	IIa	avirulent
NL03061	2003	Veendam	53°06'	6°52'	S. tuberosum	Mercator	NE	A1	IIa	avirulent
NL03065	2003	Veendam	53°06'	6°52'	S. tuberosum	Karnico	NE	A2	IIa	avirulent
NL03067	2003	Veendam	53°06'	6°52'	S. tuberosum	Mercator	NE	A1	IIa	avirulent
NL03071	2003	Odoorn	52°51'	6°50'	S. tuberosum	n.d.	NE	A1	Ia	avirulent
NL03073	2003	Weerdinge	52°49'	6°55'	S. tuberosum	n.d.	NE	A2	Ia	avirulent
NL03081	2003	Meppen	52°41'	7°17'	S. tuberosum	Seresta	NE	A1	Ia	virulent	virulent
NL03085	2003	Meppen	52°41'	7°17'	S. tuberosum	n.d.	NE	A2	Ia	avirulent
NL03086	2003	Arnemuiden	51°30'	3°40'	S. tuberosum	Asterix	SW	A2	IIa	avirulent
NL03087	2003	Arnemuiden	51°30'	3°40'	S. tuberosum	Asterix	SW	A2	IIa	avirulent
NL03089	2003	Wissenkerke	51°35'	3°45'	S. tuberosum	rode pipo	SW	A1	Ia	avirulent
NL03090	2003	Wissenkerke	51°35'	3°45'	S. tuberosum	rode pipo	SW	A1	Ia	avirulent
NL03092	2003	Geersdijk	51°34'	3°46'	S. tuberosum	Frieslander	SW	A2	Ia	avirulent
NL03094	2003	Geersdijk	51°34'	3°46'	S. tuberosum	n.d.	SW	A1	Ia	avirulent
NL03099	2003	Colijnsplaat	51°35'	3°50'	S. tuberosum	Bintje	SW	A1	Ia	avirulent
NL03102	2003	Colijnsplaat	51°35'	3°50'	S. tuberosum	Agria	SW	A1	Ia	avirulent
NL03107	2003	Colijnsplaat	51°35'	3°50'	S. tuberosum	Frieslander	SW	A1	Ia	avirulent
NL03110	2003	Nederweert-eind	51°16'	5°46'	S. tuberosum	n.d.	SE	A2	Ia	avirulent
NL03114	2003	Nederweert-eind	51°16'	5°46'	S. tuberosum	n.d.	SE	A1	IIa	avirulent
NL03115	2003	Bladel	51°21'	4°12'	S. tuberosum	n.d.	SE	A2	Ia	avirulent
NL03117	2003	Bladel	51°21'	4°12'	S. tuberosum	Russet burbank	SE	A1	Ia	virulent	virulent
NL03120	2003	Ospel	51°17'	5°47'	S. tuberosum	n.d.	SE	A2	lb	avirulent
NL03127	2003	Sellingersluis	52°56'	7°09'	S. tuberosum	n.d.	NE	A2	Ia	avirulent
NL03128	2003	Sellingersluis	52°56'	7°09'	S. tuberosum	n.d.	NE	A1	IIa	avirulent
NL03130	2003	Sellingersluis	52°56'	7°09'	S. tuberosum	n.d.	NE	A2	Ia	avirulent
NL03132	2003	Middenmeer	52°48'	5°00'	S. tuberosum	Victoria	NW	A2	IIa	avirulent
NL03135	2003	Middenmeer	52°48'	5°00'	S. tuberosum	Victoria	NW	A2	IIa	avirulent
NL03137	2003	Beemster	52°32'	4°54'	S. tuberosum	Ajiba	NW	A1	Ia	avirulent
NL03140	2003	Beemster	52°32'	4°54'	S. tuberosum	Ajiba	NW	A1	Ia	avirulent
NL03142	2003	Noordoostpolder	52°42'	5°49'	S. tuberosum	n.d.	C	A1	Ia	avirulent
NL03145	2003	Noordoostpolder	52°42'	5°49'	S. tuberosum	n.d.	C	A2	IIa	avirulent
NL03154	2003	Bant	52°46'	5°44'	S. tuberosum	n.d.	C	A1	Ia	avirulent
NL03155	2003	Bant	52°46'	5°44'	S. tuberosum	n.d.	C	A1	Ia	avirulent
NL03157	2003	Tollebeek	52°40'	5°40'	S. tuberosum	Bintje	C	A2	IIa	avirulent
NL03158	2003	Swifterbant	52°34'	5°38'	S. tuberosum	Agria	C	A2	IIa	avirulent
NL03159	2003	Swifterbant	52°34'	5°38'	S. tuberosum	Agria	C	A1	Ia	avirulent
NL04001	2004	Dedemsvaart	52°36'	6°28'	S. tuberosum	Mercator	NE	A2	Ia	avirulent
NL04005	2004	Dedemsvaart	52°36'	6°28'	S. tuberosum	Mercator	NE	A2	Ia	avirulent
NL04010	2004	Asten	51°24'	5°45'	S. tuberosum	Felsina	SE	A2	Ia	avirulent
NL04017	2004	Asten	51°24'	5°45'	S. tuberosum	Felsina	SE	A2	Ia	avirulent
NL04054	2004	t Haantje Emmen	52°48'	6°49'	S. tuberosum	Seresta	NE	A2	Ia	avirulent
NL04055	2004	t Haantje Emmen	52°48'	6°49'	S. tuberosum	Seresta	NE	A2	IIa	avirulent
NL04057	2004	Rolde	52°59'	6°38'	S. tuberosum	n.d.	NE	A2	Ia	avirulent
NL04060	2004	Rolde	52°59'	6°38'	S. tuberosum	n.d.	NE	A2	Ia	avirulent
NL04064	2004	Dedemsvaart	52°36'	6°28'	S. tuberosum	Seresta	NE	A2	IIa	avirulent
NL04065	2004	Dedemsvaart	52°36'	6°28'	S. tuberosum	Seresta	NE	A1	Ia	avirulent
NL04075	2004	Dedemsvaart	52°36'	6°28'	S. tuberosum	Seresta	NE	A1	IIa	avirulent
NL04077	2004	Dedemsvaart	52°36'	6°28'	S. tuberosum	Seresta	NE	A2	Ia	avirulent
NL04081	2004	Ommen	52°31'	6°25'	S. tuberosum	Felsina	NE	A2	IIa	avirulent
NL04082	2004	Ommen	52°31'	6°25'	S. tuberosum	Felsina	NE	A1	Ia	avirulent
NL04090	2004	Ane/Hardenberg	52°35'	6°36'	S. tuberosum	Felsina	NE	A1	Ia	avirulent
NL04092	2004	Ane/Hardenberg	52°35'	6°36'	S. tuberosum	Felsina	NE	A1	Ia	virulent	virulent
NL04097	2004	Ommen	52°31'	6°25'	S. tuberosum	Felsina	NE	A1	Ia	avirulent
NL04102	2004	Ommen	52°31'	6°25'	S. tuberosum	Felsina	NE	A2	lb	avirulent
NL04106	2004	Ane/Hardenberg	52°35'	6°36'	S. tuberosum	Felsina	NE	A1	Ia	virulent	virulent
NL04111	2004	Dedemsvaart	52°36'	6°28'	S. tuberosum	Seresta	NE	A2	Ia	avirulent
NL04114	2004	Dedemsvaart	52°36'	6°28'	S. tuberosum	Seresta	NE	A1	Ia	avirulent
NL04127	2004	Medemblik	52°46'	5°06'	S. tuberosum	Opperdoezer Ronde	NW	A2	Ia	avirulent
NL04131	2004	Medemblik	52°46'	5°06'	S. tuberosum	Opperdoezer Ronde	NW	A2	Ia	avirulent
NL04132	2004	Ospel	51°17'	5°47'	S. tuberosum	Hansa	SE	A1	IIa	avirulent
NL04136	2004	Ospel	51°17'	5°47'	S. tuberosum	Hansa	SE	A2	IIa	avirulent
NL04138	2004	Ospeldijk	51°19'	5°48'	S. tuberosum	Secura	SE	A2	Ia	avirulent
NL04141	2004	Ospel	51°17'	5°47'	S. tuberosum	n.d.	SE	A2	Ia	avirulent
NL04143	2004	Ospel	51°17'	5°47'	S. tuberosum	n.d.	SE	A2	Ia	avirulent
NL04145	2004	Ospel	51°17'	5°47'	S. tuberosum	n.d.	SE	A2	Ia	avirulent
NL04149	2004	Kelpen	51°13'	5°49'	S. tuberosum	Bintje	SE	A1	Ia	avirulent
NL04154	2004	Kelpen	51°13'	5°49'	S. tuberosum	Bintje	SE	A2	Ia	avirulent
NL04166	2004	Zeewolde	52°19'	5°32'	S. tuberosum	Lady Olympia	C	A2	IIa	avirulent
NL04172	2004	Zeewolde	52°19'	5°32'	S. tuberosum	Lady Olympia	C	A2	IIa	avirulent
NL04174	2004	Ommen	52°31'	6°25'	S. tuberosum	n.d.	NE	A2	Ia	avirulent
NL04175	2004	Ommen	52°31'	6°25'	S. tuberosum	n.d.	NE	A2	Ia	avirulent
NL04176	2004	Nieuwland	52°53'	6°16'	S. tuberosum	Felsina	SW	A2	IIa	avirulent
NL04178	2004	Nieuwland	52°53'	6°16'	S. tuberosum	Felsina	SW	A2	IIa	avirulent
NL04179	2004	Coevorden	52°39'	6°44'	S. tuberosum	Katinka	NE	A2	Ia	avirulent
NL04180	2004	Coevorden	52°39'	6°44'	S. tuberosum	Bintje	NE	A2	Ia	avirulent
NL04181	2004	Coevorden	52°39'	6°44'	S. tuberosum	Bintje	NE	A2	Ia	avirulent
NL04184	2004	Assel	52°11'	5°50'	S. tuberosum	Premiere	SE	A2	Ia	avirulent
NL04185	2004	Assel	52°11'	5°50'	S. tuberosum	Premiere	SE	A2	Ia	avirulent
NL04189	2004	Wijnandsrade	50°54'	5°53'	S. tuberosum	Lady Olympia	SE	A2	Ia	avirulent
NL04194	2004	Wijnandsrade	50°54'	5°53'	S. tuberosum	Lady Olympia	SE	A2	IIa	avirulent
NL04195	2004	Valthermond	52°52'	6°56'	S. tuberosum	Mercator	NE	A1	IIa	avirulent
NL04199	2004	Valthermond	52°52'	6°56'	S. tuberosum	Mercator	NE	A2	lb	avirulent
NL04206	2004	s Gravendeel	51°48'	4°37'	S. tuberosum	Asterix	SW	A2	IIa	avirulent
NL04223	2004	Lelystad	52°31'	5°28'	S. tuberosum	R1	C	A1	Ia	avirulent
NL04227	2004	Lelystad	52°31'	5°28'	S. tuberosum	R11	C	A1	Ia	avirulent
NL04231	2004	Lelystad	52°31'	5°28'	S. tuberosum	R3	C	A1	Ia	avirulent
NL04239	2004	Lelystad	52°31'	5°28'	S. tuberosum	R9	C	A1	Ia	avirulent
NL04248	2004	Valthermond	52°52'	6°56'	S. tuberosum	R4	NE	A2	Ia	avirulent
NL04257	2004	Valthermond	52°52'	6°56'	S. tuberosum	Biogold	NE	A2	Ia	avirulent
NL04286	2004	Vredepeel	51°32'	5°52'	S. tuberosum	n.d.	SE	A2	Ia	avirulent
NL04289	2004	Vredepeel	51°32'	5°52'	S. tuberosum	Biogold	SE	A2	Ia	avirulent
NL04302	2004	Vredepeel	51°32'	5°52'	S. tuberosum	R11	SE	A1	lb	avirulent
NL05002	2005	Sint Joosland	51°28'	3°39'	S. tuberosum	n.d.	SW	A2	IIa	avirulent
NL05005	2005	Sint Joosland	51°28'	3°39'	S. tuberosum	n.d.	SW	A1	Ia	avirulent
NL05011	2005	Opperdoes	52°45'	5°04'	S. tuberosum	Opperdoezer Ronde	NW	A2	Ia	avirulent
NL05015	2005	Opperdoes	52°45'	5°04'	S. tuberosum	Opperdoezer Ronde	NW	A2	Ia	avirulent
NL05028	2005	Tholen	51°32'	4°11'	S. tuberosum	Doré	SW	A1	Ia	avirulent
NL05034	2005	Tholen	51°32'	4°11'	S. tuberosum	Doré	SW	A1	Ia	avirulent
NL05042	2005	Tholen	51°32'	4°11'	S. tuberosum	n.d.	SW	A1	Ia	avirulent
NL05043	2005	Tholen	51°32'	4°11'	S. tuberosum	n.d.	SW	A2	Ia	avirulent
NL05045	2005	Tholen	51°32'	4°11'	S. tuberosum	n.d.	SW	A1	Ia	avirulent
NL05047	2005	Opperdoes	52°45'	5°04'	S. tuberosum	Opperdoezer Ronde	NW	A2	Ia	avirulent
NL05049	2005	Opperdoes	52°45'	5°04'	S. tuberosum	Opperdoezer Ronde	NW	A2	Ia	avirulent
NL05050	2005	Biddinghuizen	52°27'	5°41'	S. tuberosum	n.d.	C	A2	Ia	avirulent
NL05051	2005	Biddinghuizen	52°27'	5°41'	S. tuberosum	n.d.	C	A2	Ia	avirulent
NL05055	2005	Middelburg	51°30'	3°37'	S. tuberosum	Frieslander	SW	A1	Ia	avirulent
NL05059	2005	Zeewolde	52°19'	5°32'	S. tuberosum	n.d.	C	A2	Ia	avirulent
NL05061	2005	Flakkee	51°45'	4°05'	S. tuberosum	Frieslander	SW	A1	Ia	avirulent
NL05062	2005	Flakkee	51°45'	4°05'	S. tuberosum	Frieslander	SW	A1	Ia	avirulent
NL05063	2005	Colijnsplaat	51°35'	3°50'	S. tuberosum	n.d.	SW	A1	lb	avirulent
NL05064	2005	Colijnsplaat	51°35'	3°50'	S. tuberosum	n.d.	SW	A1	lb	avirulent
NL05065	2005	Nieuw Namen	51°17'	4°09'	S. tuberosum	n.d.	SW	A2	Ia	avirulent
NL05066	2005	Nieuw Namen	51°17'	4°09'	S. tuberosum	n.d.	SW	A2	Ia	avirulent
NL05067	2005	Colijnsplaat	51°35'	3°50'	S. tuberosum	Frieslander	SW	A1	lb	avirulent
NL05070	2005	Philipine	51°16'	3°45'	S. tuberosum	Frieslander	SW	A1	IIa	avirulent
NL05076	2005	Philipine	51°16'	3°45'	S. tuberosum	Frieslander	SW	A1	lb	avirulent
NL05079	2005	Hulst	51°17'	4°02'	S. tuberosum	Berber	SW	A1	Ia	avirulent
NL05081	2005	Hulst	51°17'	4°02'	S. tuberosum	Berber	SW	A1	Ia	avirulent
NL05088	2005	Hulst	51°17'	4°02'	S. tuberosum	Berber	SW	A1	Ia	avirulent
NL05090	2005	Sint Kruis	51°16'	3°29'	S. tuberosum	Fontane	SW	A2	IIa	avirulent
NL05092	2005	Sint Kruis	51°16'	3°29'	S. tuberosum	Fontane	SW	A2	IIa	avirulent
NL05097	2005	Kloetinge	51°30'	3°55'	S. tuberosum	Frieslander	SW	A1	Ia	avirulent
NL05100	2005	Kloetinge	51°30'	3°55'	S. tuberosum	Frieslander	SW	A1	Ia	avirulent
NL05110	2005	Kloetinge	51°30'	3°55'	S. tuberosum	Frieslander	SW	A1	Ia	avirulent
NL05118	2005	Kloetinge	51°30'	3°55'	S. tuberosum	n.d.	SW	A2	Ia	avirulent
NL05120	2005	Kloetinge	51°30'	3°55'	S. tuberosum	n.d.	SW	A2	Ia	avirulent
NL05123	2005	Tholen	51°32'	4°11'	S. tuberosum	Frieslander	SW	A1	Ia	avirulent
NL05126	2005	Tholen	51°32'	4°11'	S. tuberosum	Frieslander	SW	A1	Ia	avirulent
NL05143	2005	Achthuizen	51°41'	4°16'	S. tuberosum	Nicola	SW	A1	Ia	avirulent
NL05147	2005	Achthuizen	51°41'	4°16'	S. tuberosum	Nicola	SW	A2	Ia	avirulent
NL05154	2005	Achthuizen	51°41'	4°16'	S. tuberosum	Nicola	SW	A1	Ia	avirulent
NL05159	2005	Sellingen	52°56'	7°08'	S. tuberosum	Seresta	NE	A1	Ia	avirulent
NL05165	2005	Sellingen	52°56'	7°08'	S. tuberosum	Seresta	NE	A2	Ia	avirulent
NL05168	2005	Meeden	53°08'	6°55'	S. tuberosum	n.d.	NE	A2	Ia	avirulent
NL05171	2005	Meeden	53°08'	6°55'	S. tuberosum	n.d.	NE	A2	Ia	avirulent
NL05177	2005	Nieuw-Buinen	52°57'	6°55'	S. tuberosum	Seresta	NE	A1	Ia	avirulent
NL05178	2005	Nieuw-Buinen	52°57'	6°55'	S. tuberosum	Seresta	NE	A2	Ia	avirulent
NL05184	2005	Nieuw-Annerveen	53°03'	6°46'	S. tuberosum	Seresta	NE	A2	Ia	avirulent
NL05188	2005	Wildervank	53°04'	6°51'	S. tuberosum	Seresta	NE	A2	IIa	virulent	virulent
NL05191	2005	Wildervank	53°04'	6°51'	S. tuberosum	Seresta	NE	A1	Ia	avirulent
NL05192	2005	Kiel Windeweer	53°06'	6°46'	S. tuberosum	Seresta	NE	A1	IIa	avirulent
NL05195	2005	Kiel Windeweer	53°06'	6°46'	S. tuberosum	Kantara	NE	A1	Ia	virulent	virulent
NL05196	2005	Odoorn	52°51'	6°50'	S. tuberosum	Mercator	NE	A2	Ia	avirulent
NL05198	2005	Odoorn	52°51'	6°50'	S. tuberosum	Mercator	NE	A2	Ia	avirulent
NL05204	2005	Valthermond	52°52'	6°56'	S. tuberosum	Seresta	NE	A1	n.d.	avirulent
NL05206	2005	Valthermond	52°52'	6°56'	S. tuberosum	Seresta	NE	A1	Ia	avirulent
NL05220	2005	Herkingen	51°43'	4°05'	S. tuberosum	Eersteling	SW	A1	lb	avirulent
NL05223	2005	Herkingen	51°43'	4°05'	S. tuberosum	Eersteling	SW	A1	lb	avirulent
NL05230	2005	Herkingen	51°43'	4°05'	S. tuberosum	Bildstar	SW	A1	Ia	avirulent
NL05234	2005	Zeeland (prov.)	51°29'	3°50'	S. tuberosum	Festien	SW	A2	lb	avirulent
NL05238	2005	Nagele	52°38'	5°43'	S. tuberosum	Ditta	C	A2	Ia	avirulent
NL05241	2005	Nagele	52°38'	5°43'	S. tuberosum	Ditta	C	A2	Ia	avirulent
NL05245	2005	Nagele	52°38'	5°43'	S. tuberosum	Agria	C	A2	IIa	avirulent
NL05246	2005	Sevenum	51°24'	6°01'	S. tuberosum	Frieslander	SE	A2	Ia	avirulent
NL05248	2005	Sevenum	51°24'	6°01'	S. tuberosum	Frieslander	SE	A2	Ia	avirulent
NL05253	2005	Overloon	51°34'	5°56'	S. tuberosum	Fresco	SE	A2	Ia	avirulent
NL05255	2005	Overloon	51°34'	5°56'	S. tuberosum	Fresco	SE	A2	Ia	avirulent
NL05261	2005	Sevenum	51°24'	6°01'	S. tuberosum	Frieslander	SE	A2	Ia	avirulent
NL05264	2005	Sevenum	51°24'	6°01'	S. tuberosum	Frieslander	SE	A2	IIa	avirulent
NL05265	2005	Sevenum	51°24'	6°01'	S. tuberosum	Secura	SE	A2	IIa	avirulent
NL05268	2005	Sevenum	51°24'	6°01'	S. tuberosum	Secura	SE	A2	Ia	avirulent
NL05290	2005	Overloon	51°34'	5°56'	S. tuberosum	n.d.	SE	A2	Ia	avirulent
NL05291	2005	Overloon	51°34'	5°56'	S. tuberosum	n.d.	SE	A2	Ia	avirulent
NL05293	2005	Ens	52°38'	5°49'	S. tuberosum	n.d.	C	A1	Ia	avirulent
NL05300	2005	Emmeloord	52°42'	5°45'	S. tuberosum	Ditta	C	A1	lb	avirulent
NL05319	2005	Emmeloord	52°42'	5°45'	S. tuberosum	Agria	C	A1	IIa	avirulent
NL05336	2005	Wieringerwerf	52°51'	5°01'	S. tuberosum	n.d.	NW	A2	Ia	avirulent
NL05337	2005	Wieringerwerf	52°51'	5°01'	S. tuberosum	n.d.	NW	A2	Ia	avirulent
NL05341	2005	Rutten	52°48'	5°41'	S. tuberosum	n.d.	C	A2	IIa	avirulent
NL05343	2005	Rutten	52°48'	5°41'	S. tuberosum	n.d.	C	A2	IIa	avirulent
NL05346	2005	Wieringerwerf	52°51'	5°01'	S. tuberosum	n.d.	NW	A2	Ia	avirulent
NL05349	2005	Roswinkel	52°50'	7°02'	S. tuberosum	n.d.	NE	A1	lb	avirulent
NL05350	2005	Roswinkel	52°50'	7°02'	S. tuberosum	Seresta	NE	A1	Ia	avirulent
NL05353	2005	Rutten	52°48'	5°41'	S. tuberosum	Bintje	C	A2	Ia	avirulent
NL05365	2005	Kraggenburg	52°39'	5°53'	S. tuberosum	n.d.	C	A1	Ia	avirulent
NL05375	2005	Kraggenburg	52°39'	5°53'	S. tuberosum	n.d.	C	A2	Ia	avirulent
NL05378	2005	Roodeschool	53°25'	6°46'	S. tuberosum	Shepody	N	A1	Ia	avirulent
NL05384	2005	Roodeschool	53°25'	6°46'	S. tuberosum	Shepody	N	A1	Ia	virulent	virulent
NL05385	2005	Oudeschip	53°25'	6°47'	S. tuberosum	Virgo	N	A1	lb	avirulent
NL05387	2005	Oudeschip	53°25'	6°47'	S. tuberosum	Virgo	N	A1	lb	avirulent
NL05388	2005	Marknesse	52°42'	5°51'	S. tuberosum	Frieslander	C	A2	Ia	avirulent
NL05391	2005	Vredepeel	51°32'	5°52'	S. tuberosum	Spirit	SE	A2	Ia	avirulent
NL05429	2005	Wieringermeer	52°51'	5°01'	S. tuberosum	Tresor	NW	A2	Ia	avirulent
NL05430	2005	Wieringermeer	52°51'	5°01'	S. tuberosum	Tresor	NW	A2	Ia	avirulent
NL05431	2005	Tollebeek/Urk	52°39'	5°39'	S. tuberosum	Hansa	C	A2	Ia	avirulent
NL05432	2005	Tollebeek/Urk	52°39'	5°39'	S. tuberosum	Hansa	C	A2	Ia	avirulent
NL05433	2005	Nagele	52°38'	5°43'	S. tuberosum	Melodie	C	A2	Ia	avirulent
NL05434	2005	Swifterbant	52°34'	5°38'	S. tuberosum	Kondor	C	A2	Ia	avirulent
NL05435	2005	Kraggenburg	52°39'	5°53'	S. tuberosum	Spunta	C	A2	Ia	avirulent
NL05436	2005	Kraggenburg	52°39'	5°53'	S. tuberosum	Sante	C	A2	Ia	avirulent
NL05440	2005	Swifterbant	52°34'	5°38'	S. tuberosum	n.d.	C	A2	Ia	avirulent
NL05518	2005	Lelystad	52°31'	5°28'	S. tuberosum	R0	C	A2	Ia	avirulent
NL05555	2005	Swifterbant	52°34'	5°38'	S. tuberosum	Liseta	C	A2	n.d.	avirulent
NL05557	2005	Swifterbant	52°34'	5°38'	S. tuberosum	Liseta	C	A2	Ia	avirulent
NL05567	2005	Biddinghuizen	52°27'	5°41'	S. tuberosum	n.d.	C	A2	Ia	avirulent
NL05571	2005	Biddinghuizen	52°27'	5°41'	S. tuberosum	n.d.	C	A2	Ia	avirulent
NL05574	2005	Biddinghuizen	52°27'	5°41'	S. tuberosum	Remarka	C	A2	Ia	avirulent
NL05575	2005	Biddinghuizen	52°27'	5°41'	S. tuberosum	Remarka	C	A1	IIa	avirulent
NL05586	2005	Biddinghuizen	52°27'	5°41'	S. tuberosum	Biogold	C	A2	Ia	avirulent
NL05592	2005	Biddinghuizen	52°27'	5°41'	S. tuberosum	Biogold	C	A2	Ia	avirulent
NL05600	2005	Zeewolde	52°19'	5°32'	S. tuberosum	Apell	C	A2	Ia	avirulent
NL05604	2005	Zeewolde	52°19'	5°32'	S. tuberosum	Apell	C	A2	Ia	avirulent
NL05616	2005	Stoop	51°25'	5°24'	S. tuberosum	Maritima	NW	A1	Ia	avirulent
NL05618	2005	Stoop	51°25'	5°24'	S. tuberosum	Maritima	NW	A2	Ia	avirulent
NL05620	2005	Menaldum	53°12'	5°39'	S. tuberosum	n.d.	N	A2	Ia	avirulent
NL05622	2005	Menaldum	53°12'	5°39'	S. tuberosum	n.d.	N	A2	Ia	avirulent
NL05627	2005	Lelystad	52°31'	5°28'	S. tuberosum	n.d.	C	A2	Ia	avirulent
NL05659	2005	Valthermond	52°52'	6°56'	S. tuberosum	Spirit	NE	A1	Ia	avirulent
NL05676	2005	Valthermond	52°52'	6°56'	S. tuberosum	R2	NE	A2	Ia	avirulent
NL05686	2005	Vredepeel	51°32'	5°52'	S. tuberosum	Axona	SE	A2	Ia	avirulent
NL05725	2005	Vredepeel	51°32'	5°52'	S. tuberosum	R8	SE	A1	IIa	avirulent
NL05730	2005	Venlo	51°22'	6°10'	S. tuberosum	Hansa	SE	A2	Ia	avirulent
NL05741	2005	Venlo	51°22'	6°10'	S. tuberosum	Hansa	SE	A2	Ia	avirulent
NL05742	2005	Swolgen	51°29'	6°07'	S. tuberosum	Saturna	SE	A2	Ia	avirulent
NL05753	2005	Swolgen	51°29'	6°07'	S. tuberosum	Asterix	SE	A2	Ia	avirulent
NL05754	2005	Meerlo	51°30'	6°05'	S. tuberosum	Asterix	SE	A2	Ia	avirulent
NL05764	2005	Meerlo	51°30'	6°05'	S. tuberosum	n.d.	SE	A2	Ia	avirulent
NL05765	2005	Tholen	51°32'	4°11'	S. tuberosum	n.d.	SW	A1	lb	avirulent
NL05775	2005	Tholen	51°32'	4°11'	S. tuberosum	n.d.	SW	A2	Ia	avirulent
NL05776	2005	Kamperland	51°34'	3°42'	S. tuberosum	n.d.	SW	A2	Ia	avirulent
NL05781	2005	Kamperland	51°34'	3°42'	S. tuberosum	n.d.	SW	A2	Ia	avirulent
NL05782	2005	Zevenbergen	51°38'	4°35'	S. tuberosum	n.d.	SW	A2	IIa	avirulent
NL05786	2005	Zevenbergen	51°38'	4°35'	S. tuberosum	n.d.	SW	A1	lb	avirulent
NL05793	2005	Oost Capelle	51°34'	3°33'	S. tuberosum	n.d.	SW	A2	IIa	avirulent
NL05801	2005	Oost Capelle	51°34'	3°33'	S. tuberosum	n.d.	SW	A2	Ia	avirulent
NL05802	2005	Anna Paulowna	52°51'	4°49'	S. tuberosum	n.d.	SW	A2	Ia	avirulent
NL05813	2005	Anna Paulowna	52°51'	4°49'	S. tuberosum	n.d.	SW	A1	lb	avirulent
NL05816	2005	Oldenzijl	53°23'	6°42'	S. tuberosum	n.d.	N	A2	Ia	avirulent
NL05826	2005	Oldenzijl	53°23'	6°42'	S. tuberosum	n.d.	N	A1	IIa	avirulent
NL05827	2005	Noordbeemster	52°34'	4°56'	S. tuberosum	n.d.	NW	A2	Ia	avirulent
NL05838	2005	Noordbeemster	52°34'	4°56'	S. tuberosum	n.d.	NW	A2	Ia	avirulent
NL05839	2005	Medemblik	52°46'	5°06'	S. tuberosum	n.d.	NW	A2	Ia	avirulent
NL05841	2005	Medemblik	52°46'	5°06'	S. tuberosum	n.d.	NW	A1	Ia	avirulent
NL05850	2005	Erica	52°42'	6°55'	S. tuberosum	n.d.	NE	A2	Ia	avirulent
NL05855	2005	Erica	52°42'	6°31'	S. tuberosum	n.d.	NE	A1	Ia	avirulent
NL05859	2005	Eeserveen	52°52'	6°45'	S. tuberosum	n.d.	NE	A2	Ia	avirulent
NL05865	2005	Eeserveen	52°52'	6°45'	S. tuberosum	n.d.	NE	A2	Ia	avirulent
NL05869	2005	Slochteren	53°12'	6°48'	S. tuberosum	n.d.	NE	A2	Ia	avirulent
NL05879	2005	Veendam	53°06'	6°52'	S. tuberosum	n.d.	NE	A2	n.d.	avirulent
NL05888	2005	Veendam	53°06'	6°52'	S. tuberosum	n.d.	NE	A2	lb	avirulent
NL05890	2005	Dreijber	52°47'	6°32'	S. tuberosum	n.d.	NE	A2	lb	avirulent
NL05891	2005	Dreijber	52°47'	6°32'	S. tuberosum	n.d.	NE	A1	IIa	avirulent
NL05901	2005	Wijster	52°48'	6°31'	S. tuberosum	n.d.	NE	A2	Ia	avirulent
NL05918	2005	Wijster	52°48'	6°31'	S. tuberosum	n.d.	NE	A2	Ia	avirulent
NL06001	2006	Zeeland (prov.)	51°29'	3°50'	S. tuberosum	n.d.	SW	A1	Ia	avirulent
NL06002	2006	Zeeland (prov.)	51°29'	3°50'	S. tuberosum	n.d.	SW	A1	Ia	avirulent
NL06003	2006	West-Kapelle (Walcheren)	51°31'	3°27'	S. tuberosum	Frieslander	SW	A1	Ia	avirulent
NL06004	2006	West-Kapelle (Walcheren)	51°31'	3°27'	S. tuberosum	Frieslander	SW	A1	Ia	avirulent
NL06005	2006	Grijpskerke	51°31'	3°33'	S. tuberosum	Bintje	SW	A1	Ia	avirulent
NL06006	2006	Grijpskerke	51°31'	3°33'	S. tuberosum	Bintje	SW	A1	Ia	avirulent
NL06007	2006	Veere	51°32'	3°39'	S. tuberosum	Agria	SW	A2	Ia	avirulent
NL06008	2006	Veere	51°32'	3°39'	S. tuberosum	Agria	SW	A2	Ia	avirulent
NL06009	2006	Drenthe (prov.)	52°56'	6°37'	S. tuberosum	n.d.	NE	A2	lb	avirulent
NL06010	2006	Drenthe (prov.)	52°56'	6°37'	S. tuberosum	n.d.	NE	A1	Ia	avirulent
NL06011	2006	Vredepeel	51°32'	5°52'	S. tuberosum	R0	SE	A2	Ia	avirulent
NL06015	2006	Vredepeel	51°32'	5°52'	S. tuberosum	n.d.	SE	A2	IIa	avirulent
NL06021	2006	Witteveen	52°48'	6°39'	S. tuberosum	Seresta	NE	A2	Ia	avirulent
NL06022	2006	Witteveen	52°48'	6°39'	S. tuberosum	Seresta	NE	A1	Ia	avirulent
NL06023	2006	Luttelgeest	52°44'	5°51'	S. tuberosum	n.d.	C	A1	lb	avirulent
NL06024	2006	Luttelgeest	52°44'	5°51'	S. tuberosum	n.d.	C	A1	Ia	avirulent
NL06025	2006	Luttelgeest	52°44'	5°51'	S. tuberosum	n.d.	C	A1	Ia	avirulent
NL06026	2006	Lelystad	52°31'	5°28'	S. tuberosum	Ditta	C	A1	Ia	avirulent
NL06035	2006	Valthermond	52°52'	6°56'	S. tuberosum	R11	NE	A2	Ia	avirulent
NL06037	2006	Lelystad	52°31'	5°28'	S. tuberosum	R2	C	A2	Ia	avirulent
NL06059	2006	Vriezenveen	52°24'	6°36'	S. tuberosum	Bintje	NE	A2	Ia	avirulent
NL06060	2006	Vriezenveen	52°24'	6°36'	S. tuberosum	Bintje	NE	A2	Ia	avirulent
NL06061	2006	Drenthe (prov.)	52°56'	6°37'	S. tuberosum	Seresta	NE	A1	Ia	avirulent
NL06062	2006	Drenthe (prov.)	52°56'	6°37'	S. tuberosum	Seresta	NE	A1	Ia	avirulent
NL06098	2006	Sleen	52°46'	6°47'	S. tuberosum	Karakter	NE	A1	Ia	avirulent
NL06099	2006	Lelystad	52°31'	5°28'	S. tuberosum	n.d.	C	A1	Ia	avirulent
NL06138	2006	Vredepeel	51°32'	5°52'	S. tuberosum	n.d.	SE	A1	IIa	avirulent
NL06140	2006	Vredepeel	51°32'	5°52'	S. tuberosum	n.d.	SE	A1	Ia	avirulent
NL06144	2006	Nagele	52°38'	5°43'	S. tuberosum	n.d.	C	A2	Ia	avirulent
NL06151	2006	Nagele	52°38'	5°43'	S. tuberosum	n.d.	C	A2	Ia	avirulent
NL06152	2006	Heijen	51°40'	5°58'	S. tuberosum	n.d.	SE	A2	Ia	avirulent
NL06153	2006	Heijen	51°40'	5°58'	S. tuberosum	n.d.	SE	A2	Ia	avirulent
NL06154	2006	Wijster	52°48'	6°31'	S. tuberosum	n.d.	NE	A2	Ia	avirulent
NL06155	2006	Wijster	52°48'	6°31'	S. tuberosum	n.d.	NE	A2	Ia	avirulent
NL06156	2006	Ten Boer	53°16'	6°41'	S. tuberosum	n.d.	N	A2	Ia	avirulent
NL06157	2006	Ten Boer	53°16'	6°41'	S. tuberosum	n.d.	N	A2	Ia	avirulent
NL06168	2006	Vijfhuizen	52°21'	4°40'	S. tuberosum	Bintje	NW	A1	Ia	avirulent
NL06169	2006	Vijfhuizen	52°21'	4°40'	S. tuberosum	Bintje	NW	A1	Ia	avirulent
NL06170	2006	Dronten	52°31'	5°43'	S. tuberosum	n.d.	C	A2	Ia	avirulent
NL06173	2006	Dronten	52°31'	5°43'	S. tuberosum	n.d.	C	A1	lb	avirulent
NL06174	2006	Bemmel	51°53'	5°53'	S. tuberosum	n.d.	SE	A2	Ia	avirulent
NL06175	2006	Bemmel	51°53'	5°53'	S. tuberosum	n.d.	SE	A2	Ia	avirulent
NL06176	2006	Flevoland	52°31'	5°35'	S. tuberosum	Innovator	C	A1	IIa	avirulent
NL06177	2006	Flevoland	52°31'	5°35'	S. tuberosum	Innovator	C	A1	IIa	avirulent
NL06179	2006	Zevenhuizen	52°00'	4°34'	S. tuberosum	Asterix	SW	A2	Ia	avirulent
NL06182	2006	Marknesse	52°42'	5°51'	S. tuberosum	Fontane	C	A2	Ia	avirulent
NL06183	2006	Marknesse	52°42'	5°51'	S. tuberosum	Fontane	C	A2	Ia	avirulent
NL06184	2006	Kraggenburg	52°39'	5°53'	S. tuberosum	n.d.	C	A1	IIa	avirulent
NL06185	2006	Kraggenburg	52°39'	5°53'	S. tuberosum	n.d.	C	A2	Ia	avirulent
NL06186	2006	Emmeloord	52°42'	5°45'	S. tuberosum	Bintje	C	A2	Ia	avirulent
NL06187	2006	Emmeloord	52°42'	5°45'	S. tuberosum	Bintje	C	A2	Ia	avirulent
NL06189	2006	Cothen	51°59'	5°18'	S. tuberosum	Mondial	NW	A2	Ia	avirulent
NL06190	2006	Cothen	51°59'	5°18'	S. tuberosum	Agria	NW	A2	Ia	avirulent
NL06191	2006	Biddinghuizen	52°27'	5°41'	S. tuberosum	Nicola	C	A2	Ia	avirulent
NL06192	2006	Biddinghuizen	52°27'	5°41'	S. tuberosum	Nicola	C	A2	Ia	avirulent
NL06194	2006	Dronten	52°31'	5°43'	S. tuberosum	Maritima	C	A1	Ia	avirulent
NL06195	2006	Zeewolde	52°19'	5°32'	S. tuberosum	Fontane	C	A2	Ia	avirulent
NL06196	2006	Zeewolde	52°19'	5°32'	S. tuberosum	Fontane	C	A2	Ia	avirulent
NL06198	2006	Lelystad	52°31'	5°28'	S. tuberosum	Fontane	C	A1	Ia	avirulent
NL06199	2006	Luttelgeest	52°44'	5°51'	S. tuberosum	Milva	C	A2	Ia	avirulent
NL06200	2006	Luttelgeest	52°44'	5°51'	S. tuberosum	Milva	C	A2	Ia	avirulent
NL06201	2006	Flevoland	52°31'	5°35'	S. tuberosum	Bildstar	C	A2	Ia	avirulent
NL06202	2006	Flevoland	52°31'	5°35'	S. tuberosum	Bildstar	C	A2	Ia	avirulent
NL06206	2006	Noord-Sleen	52°47'	6°48'	S. tuberosum	Seresta	NE	A2	Ia	avirulent
NL06207	2006	Zuiddorpe	51°14'	3°53'	S. tuberosum	Lady Olympia	SW	A2	Ia	avirulent
NL06227	2006	Valthermond	52°52'	6°56'	S. tuberosum	n.d.	NE	A2	IIa	avirulent
NL06231	2006	Valthermond	52°52'	6°56'	S. tuberosum	n.d.	NE	A1	Ia	avirulent
NL06270	2006	Vredepeel	51°32'	5°52'	S. tuberosum	n.d.	SE	A2	Ia	avirulent
NL06274	2006	Schoonebeek	52°39'	6°53'	S. tuberosum	Seresta	NE	A1	lb	avirulent
NL06276	2006	Erica	52°42'	6°31'	S. tuberosum	Festien	NE	A2	Ia	avirulent
NL06279	2006	Noord-Sleen	52°47'	6°48'	S. tuberosum	Seresta	NE	A1	lb	avirulent
NL06281	2006	Vredepeel	51°32'	5°52'	S. tuberosum	n.d.	SE	A2	IIa	avirulent
NL07001	2007	Arnemuiden	51°30'	3°40'	S. tuberosum	n.d.	SW	A2	Ia	avirulent
NL07002	2007	Arnemuiden	51°30'	3°40'	S. tuberosum	n.d.	SW	A2	Ia	avirulent
NL07003	2007	Koudekerke	51°28'	3°33'	S. tuberosum	n.d.	SW	A2	Ia	avirulent
NL07007	2007	Koudekerke	51°28'	3°33'	S. tuberosum	n.d.	SW	A1	Ia	avirulent
NL07009	2007	Koudekerke	51°28'	3°33'	S. tuberosum	Bintje	SW	A2	Ia	avirulent
NL07011	2007	Middenmeer	52°48'	5°00'	S. tuberosum	n.d.	NW	A1	Ia	avirulent
NL07018	2007	Slootdorp	52°50'	4°58'	S. tuberosum	n.d.	NW	A2	Ia	avirulent
NL07022	2007	Alphen	51°49'	5°28'	S. tuberosum	n.d.	SE	A2	Ia	avirulent
NL07024	2007	Arnemuiden	51°30'	3°40'	S. tuberosum	Bintje	SW	A1	Ia	avirulent
NL07026	2007	Arnemuiden	51°30'	3°40'	S. tuberosum	Agria	SW	A1	Ia	avirulent
NL07028	2007	Moergestel	51°32'	5°10'	S. tuberosum	Russet Burbank	SW	A2	Ia	avirulent
NL07030	2007	Kraggenburg	52°39'	5°53'	S. tuberosum	Agria	C	A1	Ia	avirulent
NL07034	2007	Kraggenburg	52°39'	5°53'	S. tuberosum	Fontane	C	A2	Ia	avirulent
NL07036	2007	Valthermond	52°52'	6°56'	S. tuberosum	Aveka	NE	A2	Ia	avirulent
NL07041	2007	Emmen	52°47'	6°53'	S. tuberosum	Aveka	NE	A2	Ia	avirulent
NL07043	2007	Vriescheloo	53°04'	7°06'	S. tuberosum	Seresta	NE	A1	Ia	avirulent
NL07045	2007	Tuil	51°49'	5°14'	S. tuberosum	Bintje	SE	A1	lb	avirulent
NL07049	2007	Emmen	52°47'	6°53'	S. tuberosum	Berber	NE	A2	Ia	avirulent
NL07051	2007	Zwinderen	52°43'	6°40'	S. tuberosum	Seresta	NE	A2	IIa	avirulent
NL07053	2007	Emmen	52°47'	6°53'	S. tuberosum	Mercator	NE	A1	Ia	avirulent
NL07055	2007	Schermerhorn	52°36'	4°53'	S. tuberosum	Diamant	NW	A2	Ia	avirulent
NL07057	2007	Lelystad	52°31'	5°28'	S. tuberosum	Ditta	C	A2	Ia	avirulent
NL07061	2007	Alteveer	53°06'	6°25'	S. tuberosum	Seresta	NE	A2	Ia	virulent
NL07063	2007	Westerbeek	51°34'	5°51'	S. tuberosum	Hansa	SE	A2	Ia	avirulent
NL07065	2007	Odoorn	52°51'	6°50'	S. tuberosum	Festien	NE	A2	lb	avirulent
NL07067	2007	Westenesch	52°47'	6°52'	S. tuberosum	n.d.	NE	A2	Ia	avirulent
NL07069	2007	Tollebeek	52°40'	5°40'	S. tuberosum	Bintje	C	A1	Ia	avirulent
NL07073	2007	Wissenkerke	51°35'	3°45'	S. tuberosum	Lady Christl	SW	A2	Ia	avirulent
NL07075	2007	Gasselte	52°58'	6°47'	S. tuberosum	Red Star	NE	A2	Ia	avirulent
NL07076	2007	Gasselte	52°58'	6°47'	S. tuberosum	Karnico	NE	A1	Ia	avirulent
NL07078	2007	Holwerd	53°22'	5°54'	S. tuberosum	Annabel	N	A2	Ia	avirulent
NL07080	2007	Holwerd	53°22'	5°54'	S. tuberosum	Berber	N	A2	Ia	avirulent
NL07082	2007	Eursinge de Wolden (Pesse)	52°46'	6°26'	S. tuberosum	n.d.	NE	A2	Ia	avirulent
NL07084	2007	Steenderen	52°03'	6°11'	S. tuberosum	Bintje	SE	A1	Ia	avirulent
NL07086	2007	Zevenhuizen	52°00'	4°34'	S. tuberosum	Asterix	SW	A2	Ia	avirulent
NL07089	2007	Balkbrug	52°35'	6°23'	S. tuberosum	Seresta	NE	A2	IIa	avirulent
NL07091	2007	Lelystad	52°31'	5°28'	S. tuberosum	n.d.	C	A1	Ia	avirulent
NL07094	2007	Vredepeel	51°32'	5°52'	S. tuberosum	Ditta	SE	A2	Ia	avirulent
NL07107	2007	Colijnsplaat	51°35'	3°50'	S. tuberosum	Victoria	SW	A2	Ia	avirulent
NL07109	2007	Colijnsplaat	51°35'	3°50'	S. tuberosum	Agria	SW	A1	Ia	avirulent
NL07110	2007	Luttelgeest	52°44'	5°51'	S. tuberosum	Milva	C	A2	Ia	avirulent
NL07113	2007	Oudeschip	53°25'	6°47'	S. tuberosum	Kondor	N	A2	IIa	avirulent
NL07140	2007	Gapinge	51°32'	3°37'	S. tuberosum	Bintje	SW	A2	Ia	avirulent
NL07144	2007	Laren	52°15'	5°13'	S. tuberosum	Felsina	SE	A2	Ia	avirulent
NL07146	2007	Creil	52°45'	5°39'	S. tuberosum	Eigenheimer	C	A2	Ia	avirulent
NL07148	2007	Almere	52°22'	5°13'	S. tuberosum	n.d.	C	A2	Ia	avirulent
NL07149	2007	Slootdorp	52°50'	4°58'	S. tuberosum	n.d.	NW	A2	Ia	avirulent
NL07152	2007	Lelystad	52°31'	5°28'	S. tuberosum	R1	C	A2	Ia	avirulent
NL07160	2007	Lelystad	52°31'	5°28'	S. tuberosum	Biogold	C	A2	Ia	avirulent
NL07166	2007	Lelystad	52°31'	5°28'	S. tuberosum	n.d.	C	A1	Ia	avirulent
NL07173	2007	Overloon	51°34'	5°56'	S. tuberosum	Asterix	SE	A2	Ia	avirulent
NL07175	2007	Overloon	51°34'	5°56'	S. tuberosum	Ramos	SE	A2	Ia	avirulent
NL07177	2007	Overloon	51°34'	5°56'	S. tuberosum	Asterix	SE	A2	Ia	avirulent
NL07182	2007	Veghel	51°36'	5°32'	S. tuberosum	Bintje	SE	A2	Ia	avirulent
NL07185	2007	Emmeloord	52°42'	5°45'	S. tuberosum	Milva	C	A2	Ia	avirulent
NL07187	2007	Valthermond	52°52'	6°56'	S. tuberosum	R0	NE	A2	Ia	avirulent
NL07215	2007	Valthermond	52°52'	6°56'	S. tuberosum	Spirit	NE	A2	Ia	avirulent
NL07245	2007	Valthermond	52°52'	6°56'	S. tuberosum	n.d.	NE	A2	Ia	avirulent
NL07272	2007	Lelystad	52°31'	5°28'	S. tuberosum	n.d.	C	A2	Ia	avirulent
NL07282	2007	Aerdt	51°53'	6°04'	S. tuberosum	Fontane	SE	A2	Ia	avirulent
NL07336	2007	Slootdorp	52°50'	4°58'	S. tuberosum	n.d.	NW	A2	Ia	avirulent
NL07377	2007	Valthermond	52°52'	6°56'	S. tuberosum	n.d.	NE	A2	Ia	avirulent
NL07379	2007	Valthermond	52°52'	6°56'	S. tuberosum	n.d.	NE	A2	Ia	avirulent
NL07404	2007	Vredepeel	51°32'	5°52'	S. tuberosum	n.d.	SE	A1	Ia	avirulent
NL07428	2007	IJzendoorn	51°54'	5°31'	S. lycopersicum	n.d.	SE	A1	IIa	avirulent
NL07434	2007	Valthermond	52°52'	6°56'	S. tuberosum	n.d.	NE	A2	IIa	avirulent
NL07439	2007	Vredepeel	51°32'	5°52'	S. tuberosum	n.d.	SE	A2	Ia	avirulent
NL07444	2007	Lelystad	52°31'	5°28'	S. tuberosum	n.d.	C	A2	Ia	avirulent
NL07452	2007	Huijbergen	51°25'	4°22'	S. tuberosum	n.d.	SW	A2	Ia	avirulent
NL07453	2007	Slootdorp	52°50'	4°58'	S. tuberosum	n.d.	NW	A2	Ia	avirulent
NL07505	2007	Luttelgeest	52°44'	5°51'	S. tuberosum	Sarpo Mira	C	A2	Ia	avirulent
NL07507	2007	Lelystad	52°31'	5°28'	S. tuberosum	n.d.	C	A2	Ia	avirulent
NL07520	2007	IJzeren	50°50'	5°49'	S. tuberosum	n.d.	SE	A2	Ia	avirulent
NL07522	2007	Arensgenhout	50°53'	5°50'	S. tuberosum	n.d.	SE	A1	Ia	avirulent
NL07532	2007	Westmaas	51°47'	4°28'	S. tuberosum	n.d.	SW	A2	Ia	avirulent
NL07548	2007	Nispen	51°29'	4°27'	S. tuberosum	n.d.	SW	A2	Ia	avirulent
NL07550	2007	Gasselte	52°58'	6°47'	S. tuberosum	Stefano	NE	A1	Ia	avirulent
NL07564	2007	Erica	52°42'	6°31'	S. tuberosum	Seresta	NE	A1	Ia	avirulent
NL07568	2007	Klijndijk	52°49'	6°51'	S. tuberosum	Aveka	NE	A2	Ia	avirulent
NL07572	2007	Valthermond	52°52'	6°56'	S. tuberosum	Mantia	NE	A2	Ia	avirulent
NL08005	2008	Vredepeel	51°32'	5°52'	S. tuberosum	R0	SE	A1	Ia	avirulent
NL08008	2008	Vredepeel	51°32'	5°52'	S. tuberosum	R1	SE	A2	Ia	avirulent
NL08011	2008	Vredepeel	51°32'	5°52'	S. tuberosum	R3	SE	A1	Ia	avirulent
NL08013	2008	Vredepeel	51°32'	5°52'	S. tuberosum	R4	SE	A2	Ia	avirulent
NL08020	2008	Vredepeel	51°32'	5°52'	S. tuberosum	R10	SE	A2	Ia	avirulent
NL08047	2008	Vredepeel	51°32'	5°52'	S. tuberosum	n.d.	SE	A1	Ib	avirulent
NL08077	2008	Veghel	51°36'	5°32'	S. tuberosum	Bintje	SE	A1	Ia	avirulent
NL08078	2008	Veghel	51°36'	5°32'	S. tuberosum	Bintje	SE	A1	Ia	avirulent
NL08079	2008	Almere	52°22'	5°13'	S. tuberosum	Inova	C	A1	Ia	avirulent
NL08080	2008	Almere	52°22'	5°13'	S. tuberosum	Inova	C	A1	Ia	avirulent
NL08081	2008	Wageningen	51°58'	5°39'	S. tuberosum	Bintje	SE	A2	Ia	avirulent
NL08082	2008	Wageningen	51°58'	5°39'	S. tuberosum	Biogold	SE	A2	Ia	avirulent
NL08083	2008	Wageningen	51°58'	5°39'	S. tuberosum	Biogold	SE	A2	Ia	avirulent
NL08148	2008	Nijmegen	51°50'	5°51'	S. tuberosum	Innovator	SE	A2	Ia	avirulent
NL08149	2008	Coevorden	52°39'	6°44'	S. tuberosum	Nicola	NE	A2	Ia	avirulent
NL08212	2008	Valthermond	52°52'	6°56'	S. tuberosum	R0	NE	A2	IIa	virulent	virulent
NL08215	2008	Valthermond	52°52'	6°56'	S. tuberosum	R1	NE	A2	Ia	avirulent
NL08235	2008	Valthermond	52°52'	6°56'	S. tuberosum	R9	NE	A2	Ia	avirulent
NL08271	2008	Valthermond	52°52'	6°56'	S. tuberosum	n.d.	NE	A2	IIa	avirulent
NL08400	2008	St. Annaparochie	53°16'	5°39'	S. tuberosum	n.d.	N	A2	Ia	avirulent
NL08401	2008	St. Annaparochie	53°16'	5°39'	S. tuberosum	n.d.	N	A2	Ia	avirulent
NL08403	2008	Erp	51°36'	5°37'	S. tuberosum	Frieslander	SE	A2	Ia	avirulent
NL08404	2008	Erp	51°36'	5°37'	S. tuberosum	Sante	SE	A2	Ia	avirulent
NL08405	2008	Overloon	51°34'	5°56'	S. tuberosum	n.d.	SE	A2	Ia	avirulent
NL08406	2008	Overloon	51°34'	5°56'	S. tuberosum	n.d.	SE	A2	Ia	avirulent
NL08419	2008	Lelystad	52°31'	5°28'	S. tuberosum	R2	C	A2	Ia	avirulent
NL08451	2008	Lelystad	52°31'	5°28'	S. tuberosum	n.d.	C	A2	Ia	avirulent
NL08452	2008	Lelystad	52°31'	5°28'	S. tuberosum	n.d.	C	A1	Ib	avirulent
NL08453	2008	Lelystad	52°31'	5°28'	S. tuberosum	n.d.	C	A1	Ia	avirulent
NL08509	2008	Wageningen	51°58'	5°39'	S. lycopersicum	n.d.	SE	A1	IIa	avirulent
NL08510	2008	Baak	52°04'	6°13'	S. tuberosum	n.d.	SE	A1	Ia	avirulent
NL08511	2008	Baak	52°04'	6°13'	S. tuberosum	n.d.	SE	A2	Ia	avirulent
NL08512	2008	Ravenstein	51°09'	4°01'	S. tuberosum	n.d.	SE	A2	Ia	avirulent
NL08513	2008	Ravenstein	51°09'	4°01'	S. tuberosum	n.d.	SE	A1	Ia	avirulent
NL08515	2008	Elst	51°55'	5°50'	S. tuberosum	n.d.	SE	A1	Ib	avirulent
NL08531	2008	Lelystad	52°31'	5°28'	S. tuberosum	n.d.	C	A2	Ia	avirulent
NL08532	2008	Lelystad	52°31'	5°28'	S. tuberosum	n.d.	C	A2	Ia	avirulent
NL08574	2008	Westmaas	51°47'	4°28'	S. tuberosum	n.d.	SW	A2	Ia	avirulent
NL08575	2008	Westmaas	51°47'	4°28'	S. tuberosum	n.d.	SW	A2	Ia	avirulent
NL08576	2008	Ebelsheerd	53°11'	7°09'	S. tuberosum	n.d.	N	A2	Ia	avirulent
NL08577	2008	Ebelsheerd	53°11'	7°09'	S. tuberosum	n.d.	N	A2	Ia	avirulent
NL08578	2008	Wijster	52°48'	6°31'	S. tuberosum	n.d.	NE	A2	Ia	avirulent
NL08579	2008	Wijster	52°48'	6°31'	S. tuberosum	n.d.	NE	A2	Ia	avirulent
NL08709	2008	Nijmegen	51°50'	5°51'	S. tuberosum	Sarpo Mira	SE	A2	Ia	avirulent
NL08798	2008	Wageningen	51°58'	5°39'	S. lycopersicum	n.d.	SE	A2	Ia	avirulent
NL08840	2008	Zweelo	52°48'	6°44'	S. tuberosum	Avarna	NE	A2	Ia	avirulent
NL08841	2008	Zweelo	52°48'	6°44'	S. tuberosum	Avarna	NE	A2	Ia	avirulent
NL09003	2009	Onstwedde	53°02'	7°03'	S. tuberosum	Seresta	NE	A1	Ia	avirulent
NL09004	2009	Onstwedde	53°02'	7°03'	S. tuberosum	Aveka	NE	A2	Ia	avirulent
NL09005	2009	Valthe	52°50'	6°53'	S. tuberosum	n.d.	NE	A2	Ia	avirulent
NL09006	2009	Luttelgeest	52°44'	5°51'	S. tuberosum	Lady Rosetta	C	A2	Ia	avirulent
NL09007	2009	Ter Apel	52°52'	7°03'	S. tuberosum	Bintje	NE	A2	Ia	avirulent
NL09008	2009	Ritthem	51°27'	3°38'	S. tuberosum	Miranda	SW	A2	Ia	avirulent
NL09013	2009	Vredepeel	51°32'	5°52'	S. tuberosum	Agria	SE	A2	Ia	avirulent
NL09014	2009	Luttelgeest	52°44'	5°51'	S. tuberosum	Eersteling	C	A2	Ia	avirulent
NL09016	2009	Biggekerke	51°29'	3°31'	S. tuberosum	Agria	SW	A2	Ia	avirulent
NL09017	2009	Lelystad	52°31'	5°28'	S. tuberosum	n.d.	C	A1	Ia	avirulent
NL09018	2009	Soerendonk	51°18'	5°34'	S. tuberosum	Bintje	SE	A2	Ia	avirulent
NL09021	2009	Lelystad	52°31'	5°28'	S. tuberosum	Desiree	C	A1	Ia	avirulent
NL09024	2009	Lelystad	52°31'	5°28'	S. tuberosum	Bintje	C	A2	Ia	avirulent
NL09025	2009	Creil	52°45'	5°39'	S. tuberosum	Agria	C	A2	IIa	avirulent
NL09026	2009	Creil	52°45'	5°39'	S. tuberosum	Agria	C	A1	Ia	avirulent
NL09027	2009	Erp	51°36'	5°37'	S. tuberosum	n.d.	SE	A2	Ia	avirulent
NL09028	2009	Odoorn	52°51'	6°50'	S. tuberosum	n.d.	NE	A1	Ia	avirulent
NL09029	2009	Nijmegen	51°50'	5°51'	S. tuberosum	Innovator	SE	A2	Ia	avirulent
NL09030	2009	Luttelgeest	52°44'	5°51'	S. tuberosum	Bionica	C	A2	Ib	avirulent
NL09036	2009	Valthermond	52°52'	6°56'	S. tuberosum	Bintje	NE	A1	Ia	avirulent
NL09037	2009	Kruiningen	51°27'	4°02'	S. tuberosum	n.d.	SW	A2	Ia	avirulent
NL09056	2009	Vredepeel	51°32'	5°52'	S. tuberosum	Bintje	SE	A2	Ia	avirulent
NL09057	2009	Veghel	51°36'	5°32'	S. tuberosum	Bintje	SE	A2	Ia	avirulent
NL09058	2009	Vredepeel	51°32'	5°52'	S. tuberosum	Hansa	SE	A2	Ia	avirulent
NL09061	2009	Odoornerveen	52°50'	6°47'	S. tuberosum	Seresta	NE	A2	IIa	avirulent
NL09062	2009	Valthermond	52°52'	6°56'	S. tuberosum	n.d.	NE	A1	Ia	avirulent
NL09063	2009	Valthermond	52°52'	6°56'	S. tuberosum	n.d.	NE	A1	Ia	virulent	virulent
NL09068	2009	Valthermond	52°52'	6°56'	S. tuberosum	n.d.	NE	A2	Ia	avirulent
NL09069	2009	Valthermond	52°52'	6°56'	S. tuberosum	n.d.	NE	A2	Ia	avirulent
NL09073	2009	Overloon	51°34'	5°56'	S. tuberosum	Asterix	SE	A2	Ia	avirulent
NL09074	2009	Overloon	51°34'	5°56'	S. tuberosum	Asterix	SE	A2	Ia	avirulent
NL09075	2009	Wageningen	51°58'	5°39'	S. tuberosum	n.d.	SE	A1	Ia	avirulent
NL09076	2009	Lelystad	52°31'	5°28'	S. tuberosum	Bionica	C	A2	Ia	avirulent
NL09101	2009	Lelystad	52°31'	5°28'	S. tuberosum	Toluca	C	A1	Ia	avirulent
NL09110	2009	Vredepeel	51°32'	5°52'	S. tuberosum	Biogold	SE	A2	Ia	avirulent
NL09114	2009	Wageningen	51°58'	5°39'	S. tuberosum	n.d.	SE	A2	Ia	avirulent
NL09115	2009	Wageningen	51°58'	5°39'	S. tuberosum	n.d.	SE	A1	Ia	avirulent
NL09119	2009	Valthermond	52°52'	6°56'	S. tuberosum	Desiree	NE	A2	Ia	avirulent
NL09123	2009	Exloo	52°52'	6°51'	S. tuberosum	Aveka	NE	A1	IIa	avirulent
NL09124	2009	Wageningen	51°58'	5°39'	S. tuberosum	n.d.	SE	A2	Ia	avirulent
NL09129	2009	Vredepeel	51°32'	5°52'	Solanum spp.	n.d.	SE	A2	Ia	avirulent
NL09154	2009	Overloon	51°34'	5°56'	S. tuberosum	Asterix	SE	A2	Ia	avirulent
NL09157	2009	Venray	51°31'	5°58'	S. tuberosum	Ramos	SE	A2	Ia	avirulent
NL09161	2009	Wageningen	51°58'	5°39'	Solanum spp.	n.d.	SE	A2	Ia	avirulent
NL09172	2009	Vredepeel	51°32'	5°52'	S. tuberosum	Bionica	SE	A2	Ia	avirulent
NL09217	2009	Vredepeel	51°32'	5°52'	S. tuberosum	R8	SE	A1	Ia	avirulent
NL09238	2009	Valthermond	52°52'	6°56'	S. tuberosum	Biogold	NE	A2	IIa	avirulent
NL09250	2009	Lelystad	52°31'	5°28'	S. tuberosum	Toluca	C	A2	Ia	avirulent
NL09251	2009	n.d.			S. tuberosum	Bionica	C	A2	Ib	avirulent
NL09252	2009	n.d.			S. tuberosum	Bionica	C	A2	Ib	avirulent
NL09253	2009	n.d.			S. tuberosum	Bionica	C	A2	Ib	avirulent
NL09254	2009	n.d.			S. tuberosum	Bionica	C	A2	Ib	avirulent
NL09255	2009	Biddinghuizen	52°27'	5°41'	S. tuberosum	n.d.	C	A2	Ia	avirulent
NL09256	2009	Biddinghuizen	52°27'	5°41'	S. tuberosum	Agria	C	A1	Ia	avirulent
NL09257	2009	Biddinghuizen	52°27'	5°41'	S. tuberosum	n.d.	C	A2	Ia	avirulent
NL09258	2009	Zeewolde	52°19'	5°32'	S. tuberosum	n.d.	C	A1	Ia	avirulent
NL09259	2009	Dronten	52°31'	5°43'	S. tuberosum	Asterix	C	A2	Ia	avirulent
NL09260	2009	Lelystad	52°31'	5°28'	S. tuberosum	Bintje	C	A2	Ia	avirulent
NL09261	2009	Lelystad	52°31'	5°28'	S. tuberosum	Bintje	C	A1	Ia	avirulent
NL09290	2009	Biddinghuizen	52°27'	5°41'	S. tuberosum	n.d.	C	A1	Ia	avirulent
NL09291	2009	Zeewolde	52°19'	5°32'	S. tuberosum	n.d.	C	A1	Ia	avirulent
NL09292	2009	Zeewolde	52°19'	5°32'	S. tuberosum	n.d.	C	A2	Ia	avirulent
NL09293	2009	Zeewolde	52°19'	5°32'	S. tuberosum	n.d.	C	A2	Ia	avirulent
NL09294	2009	Zeewolde	52°19'	5°32'	S. tuberosum	n.d.	C	A1	Ia	avirulent
NL09300	2009	Valthermond	52°52'	6°56'	S. tuberosum	Toluca	NE	A2	Ia	avirulent
NL09316	2009	Vredepeel	51°32'	5°52'	S. tuberosum	Toluca	SE	A2	Ia	avirulent
NL09317	2009	Oploo	51°36'	5°52'	S. tuberosum	n.d.	SE	A2	Ia	avirulent
NL09318	2009	Oploo	51°36'	5°52'	S. tuberosum	n.d.	SE	A2	Ia	avirulent
NL09319	2009	Dronten	52°31'	5°43'	S. tuberosum	Challenger	C	A1	Ia	avirulent
NL09320	2009	Dronten	52°31'	5°43'	S. tuberosum	Challenger	C	A1	Ia	avirulent
NL09321	2009	Tollebeek	52°40'	5°40'	S. tuberosum	Russet Burbank	C	A2	Ia	avirulent
NL09322	2009	Westmaas	51°47'	4°28'	S. tuberosum	Bintje	SW	A2	Ia	avirulent
NL09323	2009	Westmaas	51°47'	4°28'	S. tuberosum	Bintje	SW	A2	Ia	avirulent
NL09324	2009	Westmaas	51°47'	4°28'	S. tuberosum	Bintje	SW	A2	n.d.	avirulent
NL09325	2009	Tolbert	53°10'	6°21'	S. tuberosum	Texla	NE	A2	Ia	avirulent
NL09326	2009	Tolbert	53°10'	6°21'	S. tuberosum	Texla	NE	A2	IIa	avirulent
NL09352	2009	Nieuw-Amsterdam	52°42'	6°51'	S. tuberosum	Seresta	NE	A2	Ia	avirulent
NL09380	2009	Zeewolde	52°19'	5°32'	S. tuberosum	Bintje	C	A2	Ia	avirulent
NL09381	2009	Dronten	52°31'	5°43'	S. tuberosum	Lady Claire	C	A2	Ia	avirulent
NL09382	2009	Valthermond	52°52'	6°56'	Solanum spp.	n.d.	NE	A2	Ia	avirulent
NL09383	2009	Valthermond	52°52'	6°56'	Solanum spp.	n.d.	NE	A2	Ib	avirulent
NL09385	2009	Zeewolde	52°19'	5°32'	S. tuberosum	Lindita	C	A2	Ia	avirulent
NL09386	2009	Schokland	52°38'	5°46'	S. tuberosum	n.d.	C	A2	Ia	avirulent
proefveld_Flevo	1987	Zeewolde	52°19'	5°32'	S. tuberosum	n.d.	C	A2	n.d.	avirulent
proefveld_leerdam_1983	1983	Leerdam	51°53'	5°05'	S. tuberosum	n.d.	SW	A1	Ia	avirulent
proefveld_lienden_1984	1984	Lienden	51°56'	5°31'	S. tuberosum	n.d.	SE	A1	Ia	avirulent
rector_renkum_1983	1983	Lienden	51°56'	5°31'	S. tuberosum	n.d.	SE	A1	Ib	avirulent
T30-4	/	n.d.			n.d.	n.d.	/	A1	Ia	avirulent
van_Loon_1984	1984	n.d.			n.d.	n.d.	n.d.	A1	Ib	avirulent
VK1.4	1958	Drenthe (prov.)	52°56'	6°37'	S. tuberosum	n.d.	NE	A1	lb	avirulent
zaailing_hermsen_herisolatie_81227	1981	Renkum	51°59'	5°44'	Solanum spp.	n.d.	SE	A2	Ia	avirulent
